# Supplementary material
Source: JCI journal article supplement (doi:10.1172/jci188612)
Supplement: sd2 [file 2]

**Figure 1**

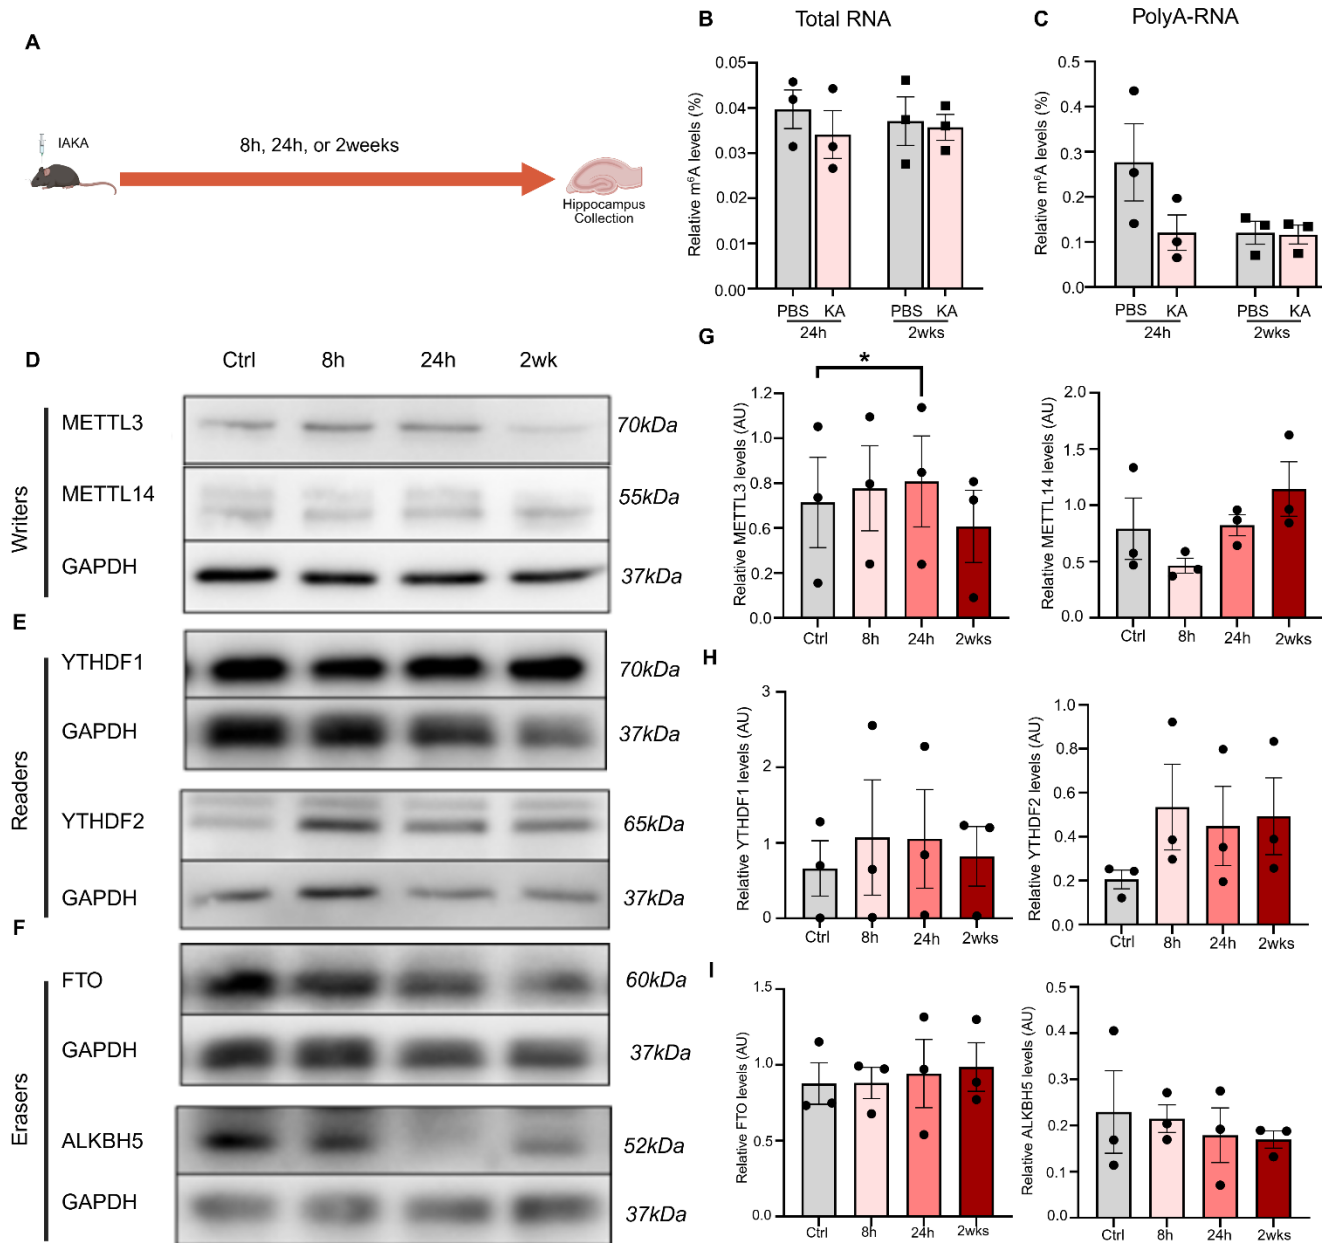

**Figure 1D**

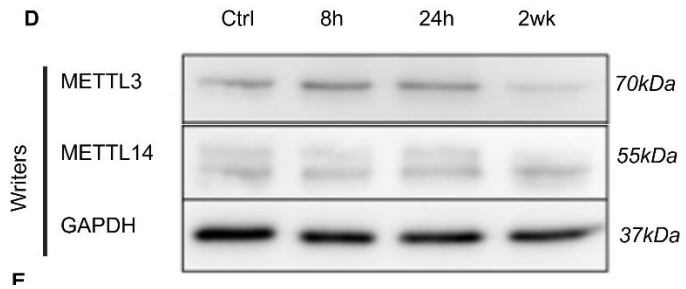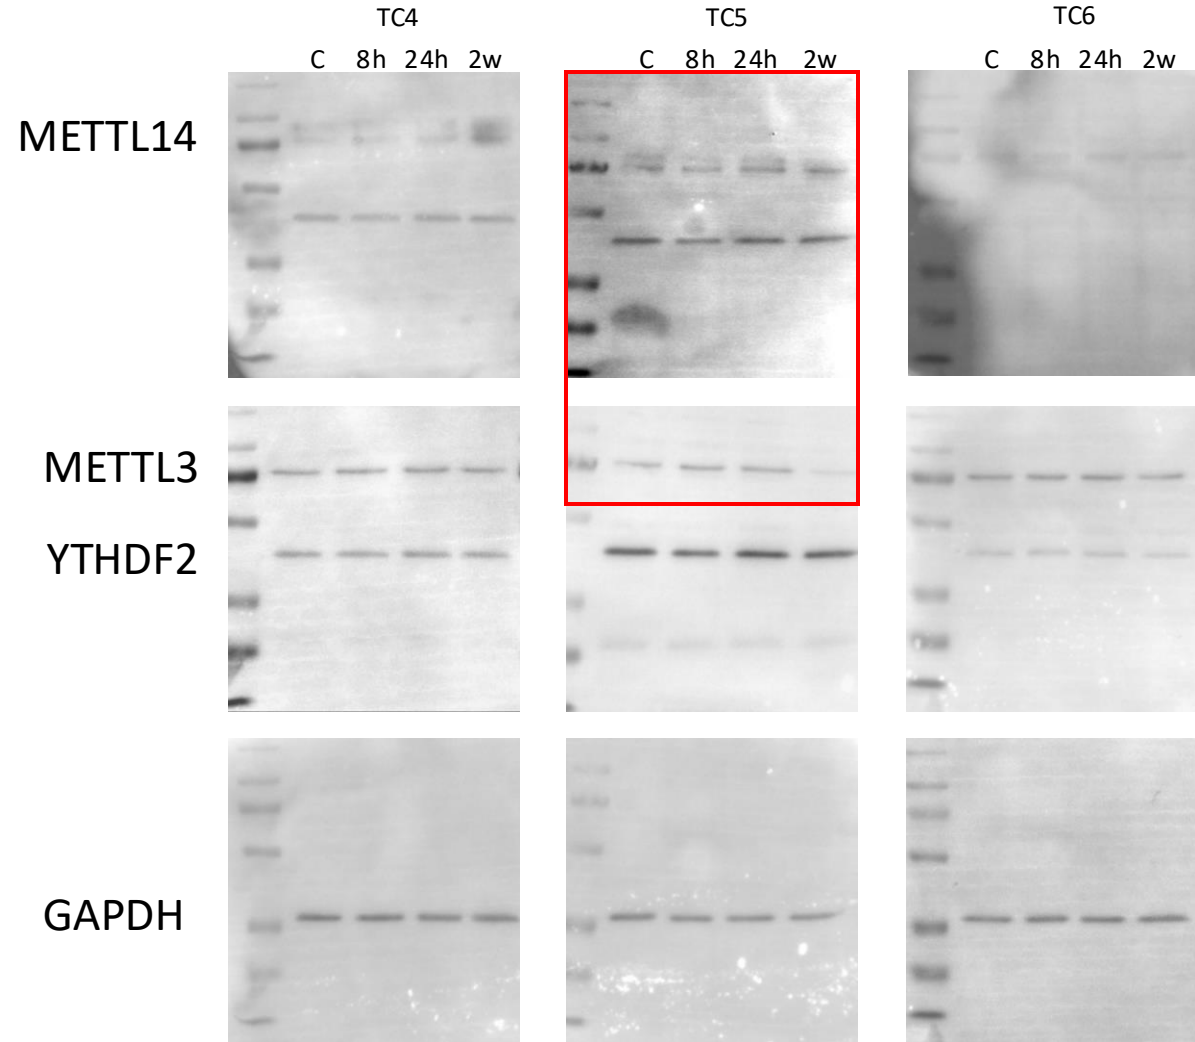

**Figure 1E**

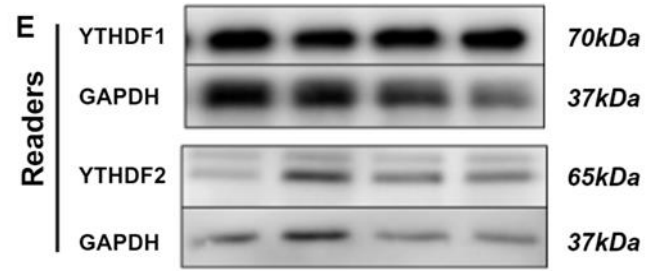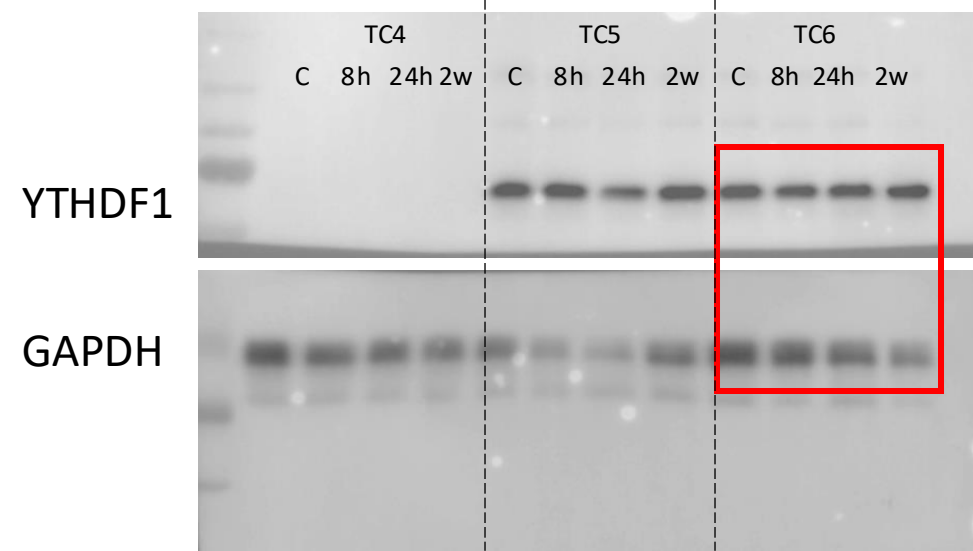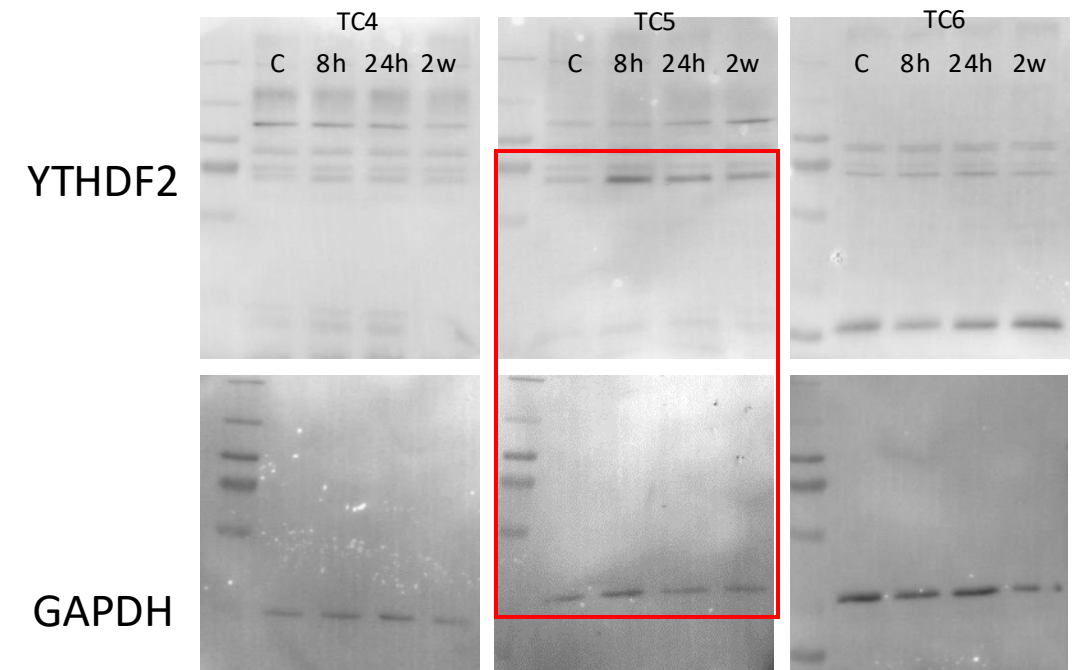

**Figure 1F**

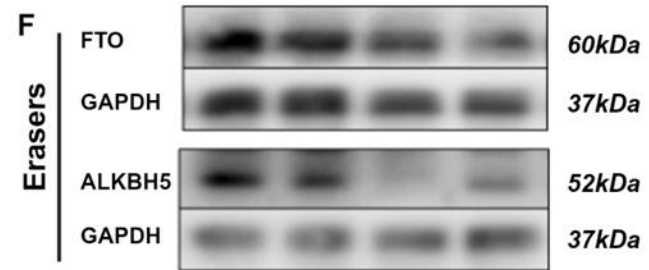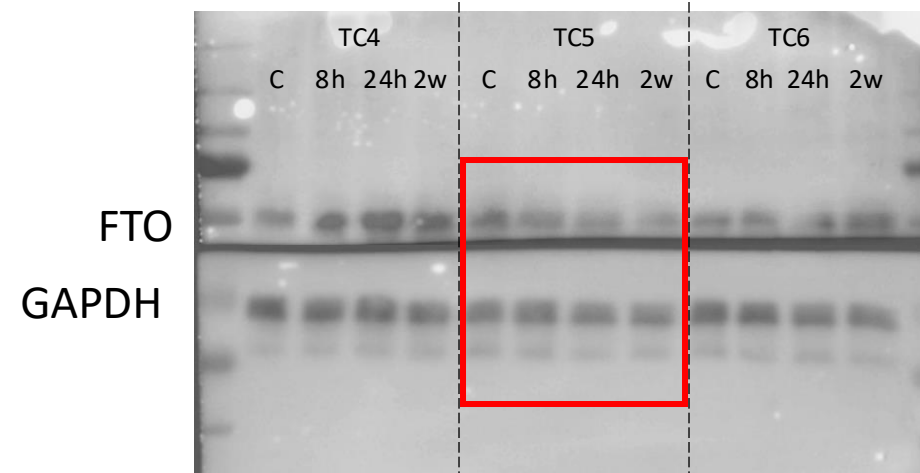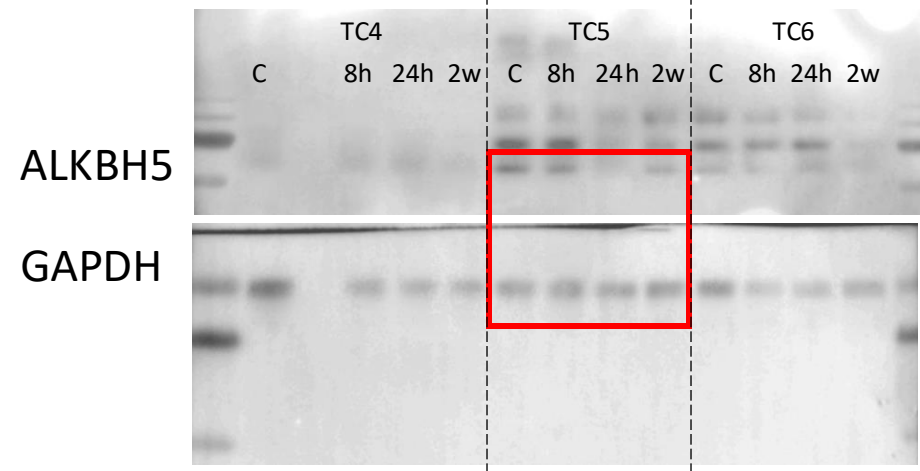

**Figure 2**

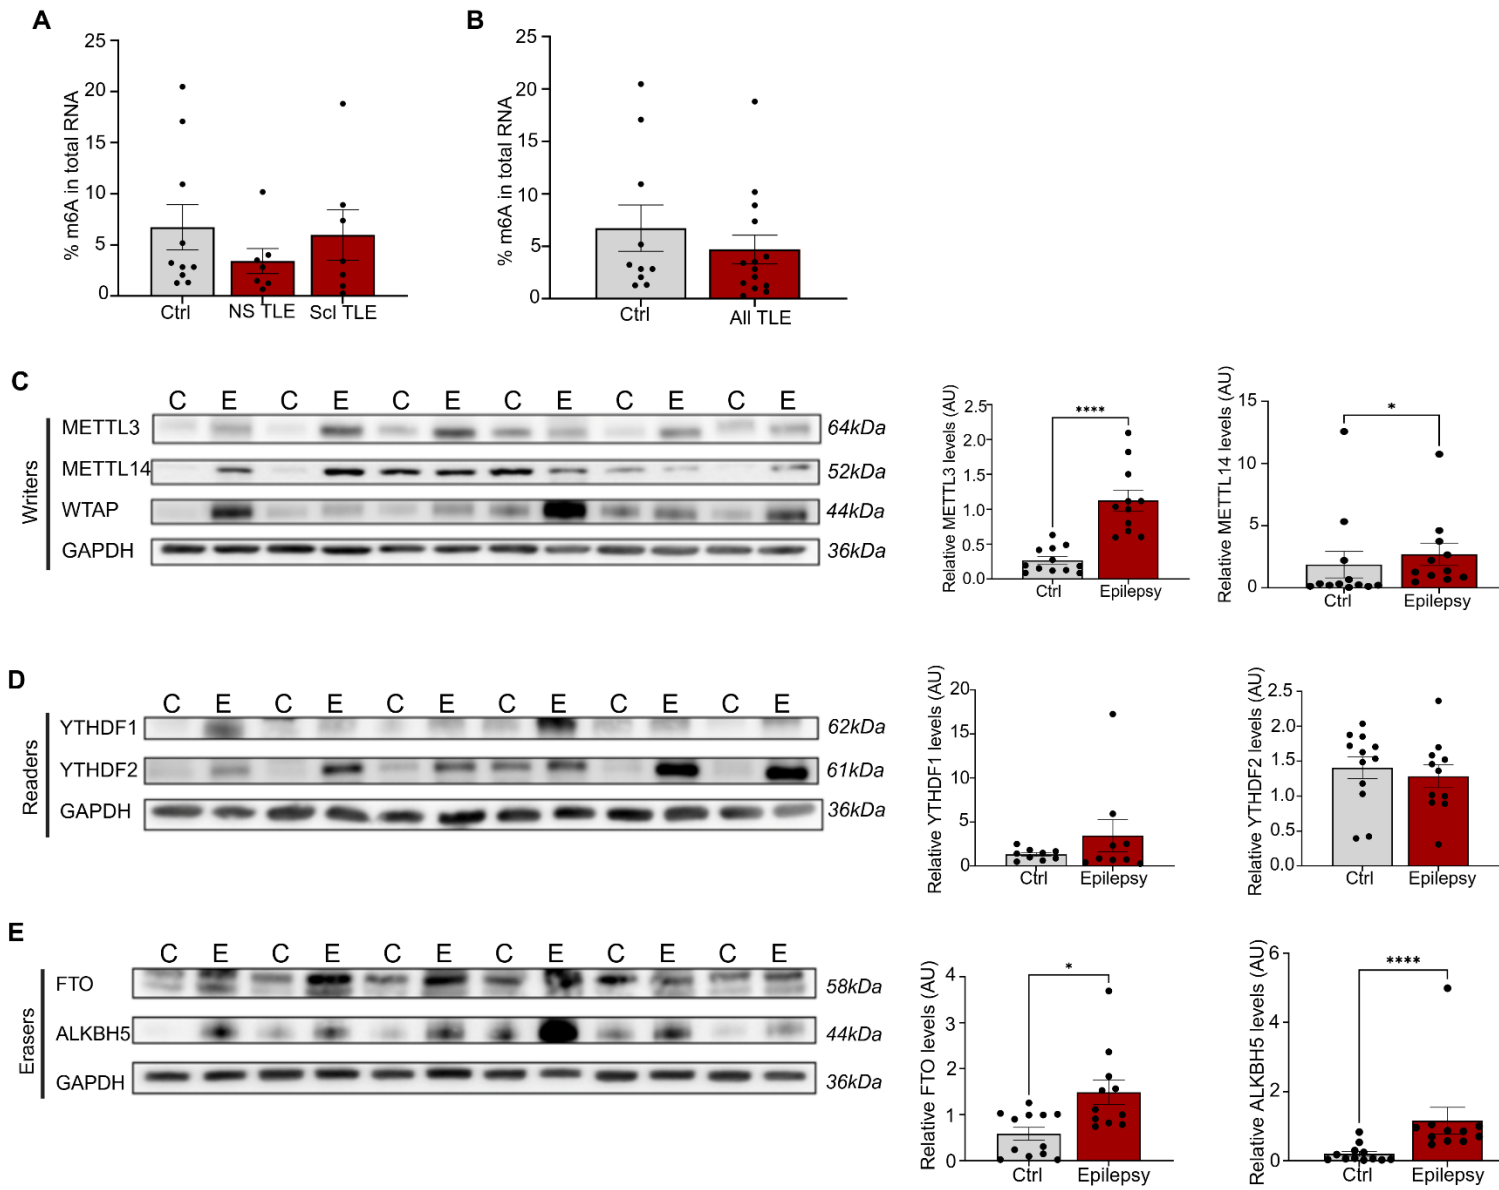

Figure 2C

METTL3 Blot 2021/04/23

METTL3 Blot 2022/05/25

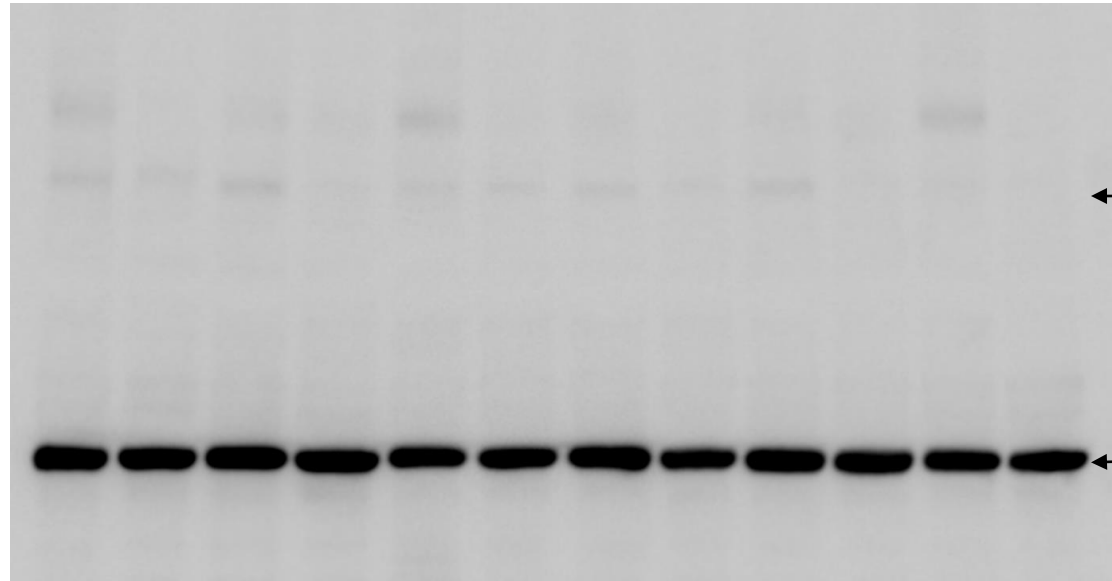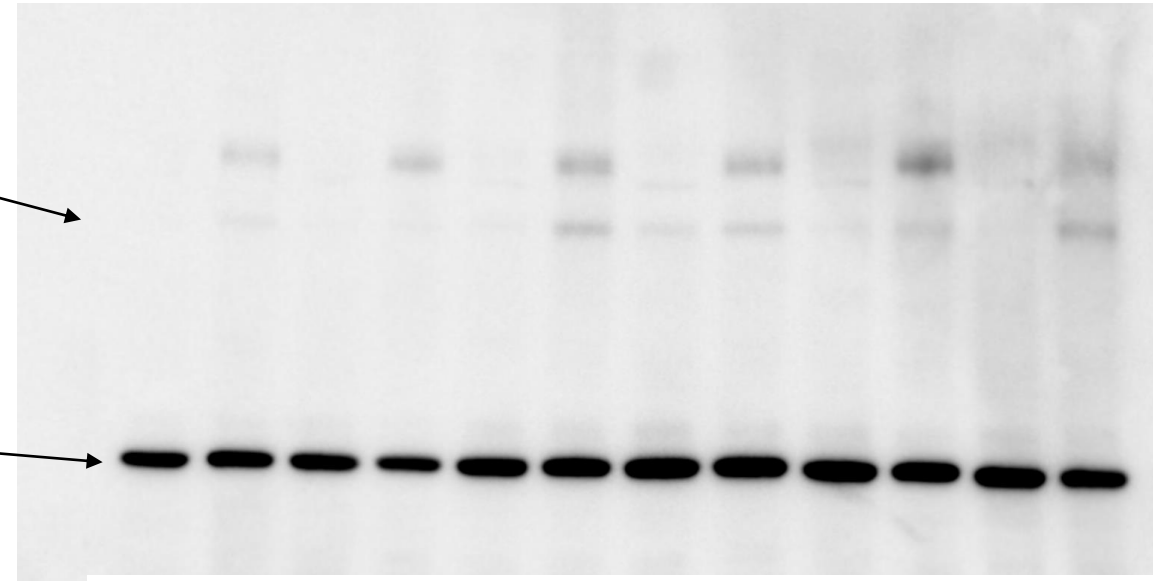

← METTL3 →

← GAPDH →

C1 E1 C2 E2 C3 E3 C4 E4 C5 E5 C6 E6

C1 E1 C2 E2 C3 E3 C4 E4 C5 E5 C6 E6

METTL14 Blot 2021/07/10

Figure 2C

METTL14 Blot 2022/05/26

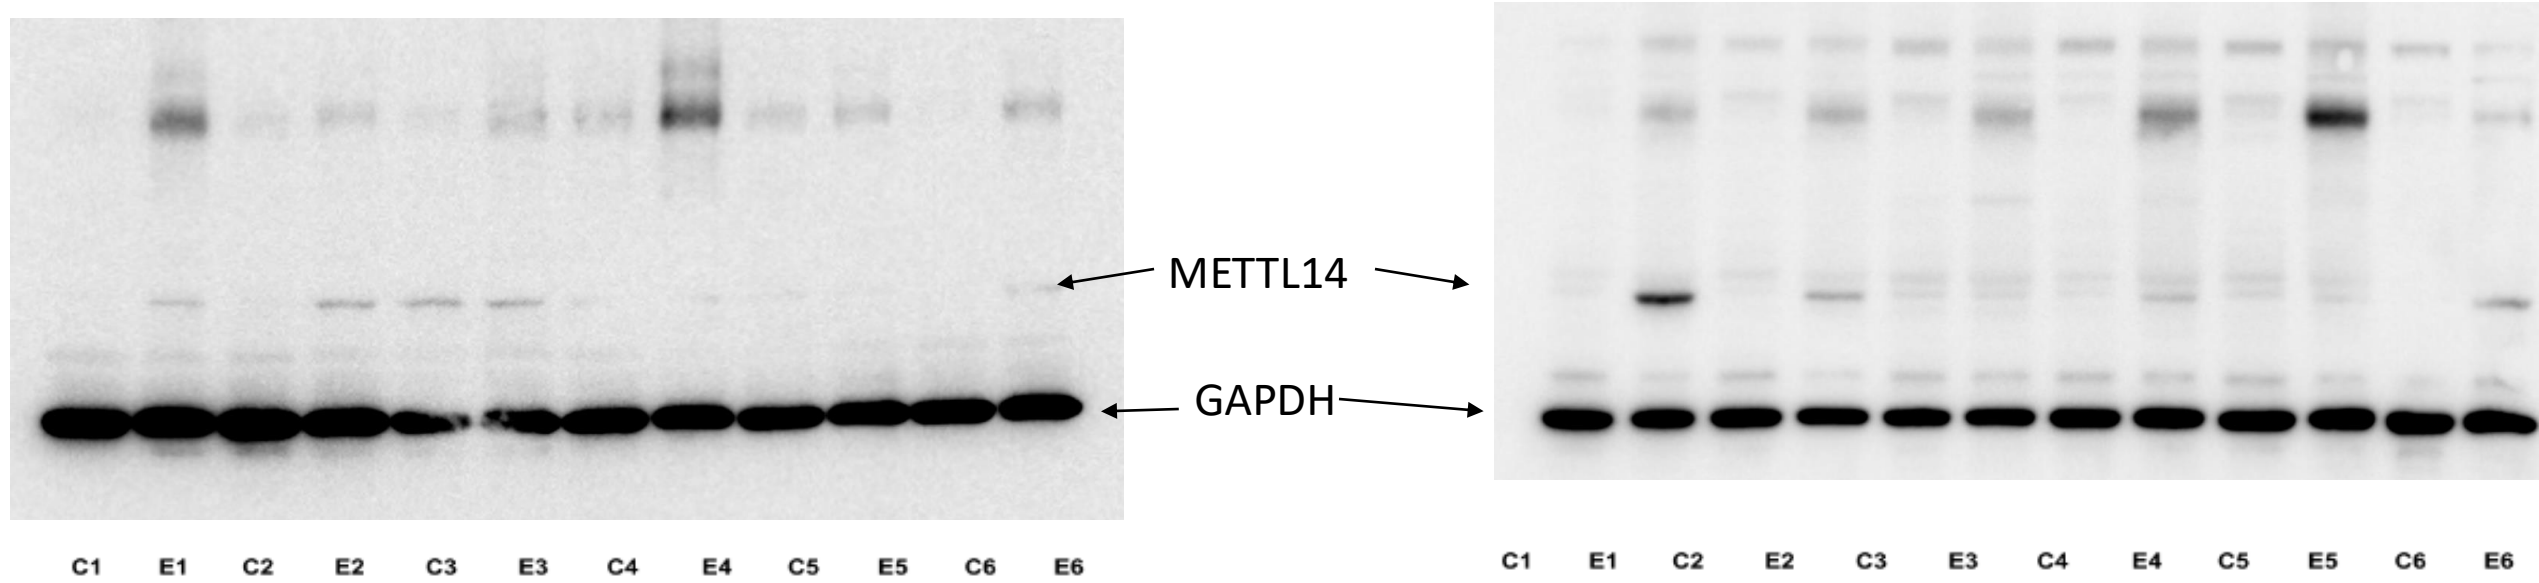

Figure 2C

WTAP Blot 2021/08/19

WTAP Blot 2022/06/29

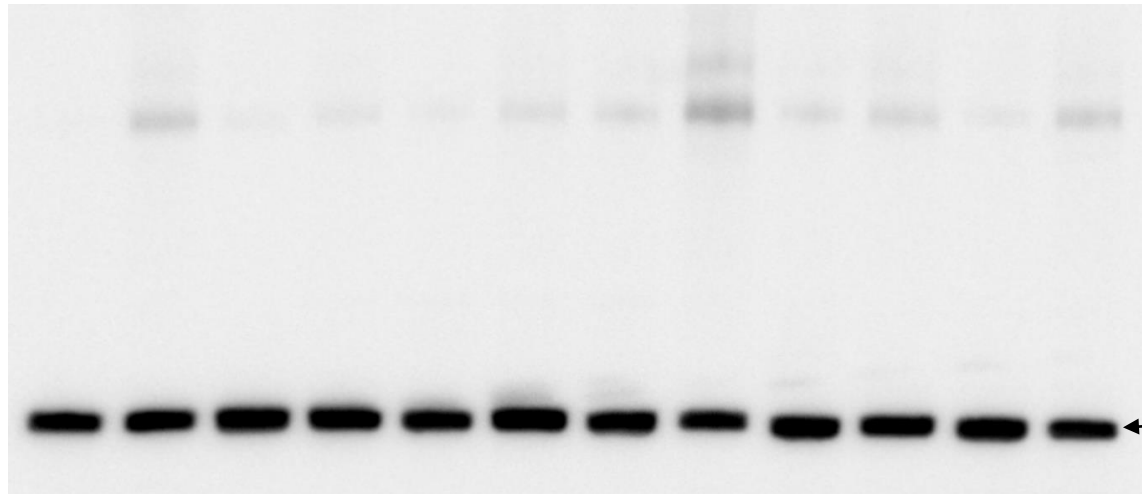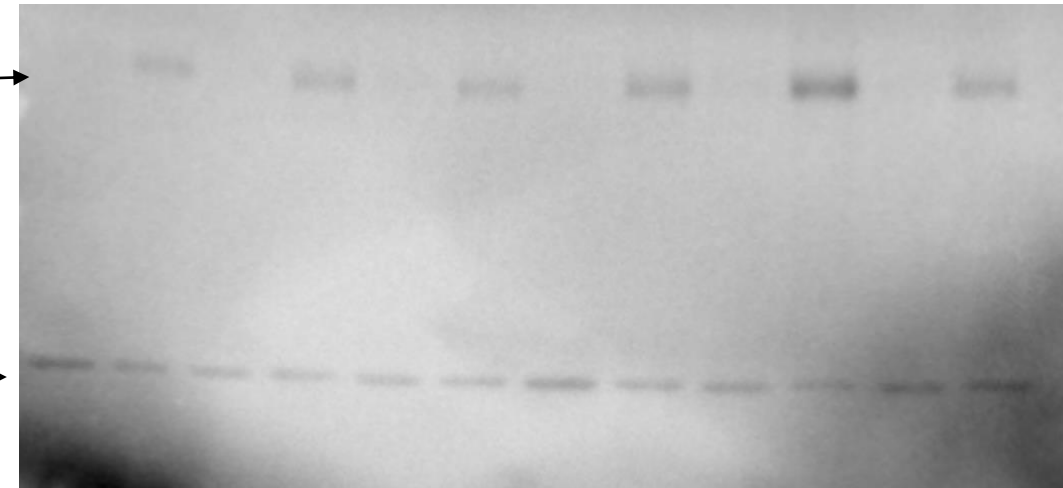

C1 E1 C2 E2 C3 E3 C4 E4 C5 E5 C6 E6

C1 E1 C2 E2 C3 E3 C4 E4 C5 E5 C6 E6

Figure 2D

YTHDF1\* Blot 2021/07/07

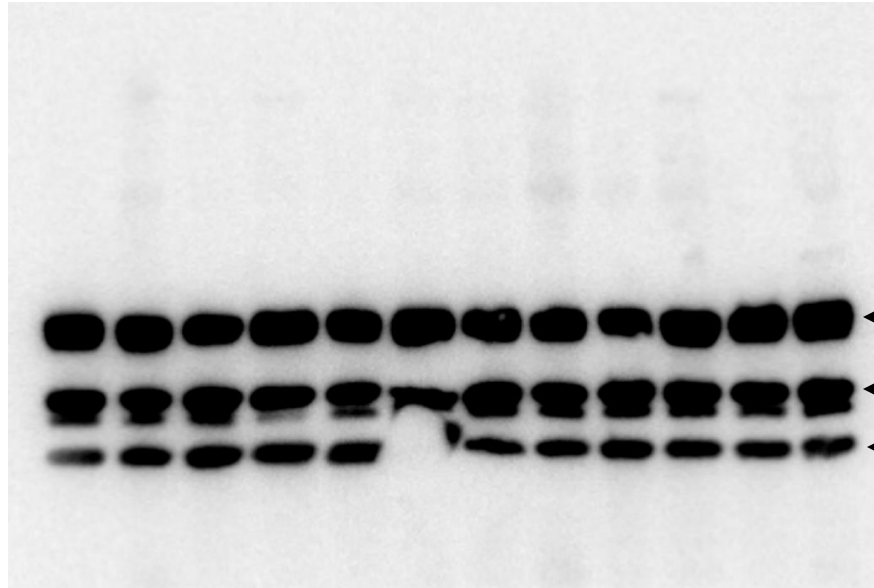

C1 E1 C2 E2 C3 E3 C4 E4 C5 E5 C6 E6

YTHDF1 Blot 2022/04/13

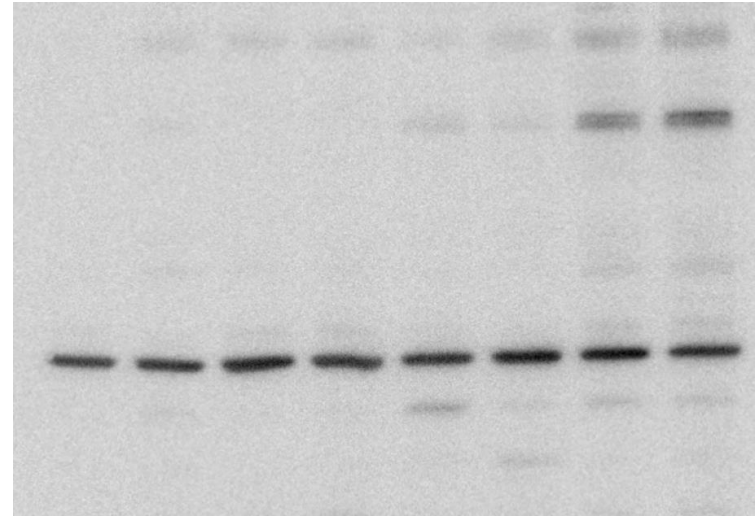

C1 C2 C3 C3 E1 E2 E3 E4

\*Normalized with Tubulin as a bubble in the gel made GAPDH and B-actin normalization impossible.

YTHDF2 Blot 2021/07/29

Figure 2D

YTHDF2 Blot 2022/06/30

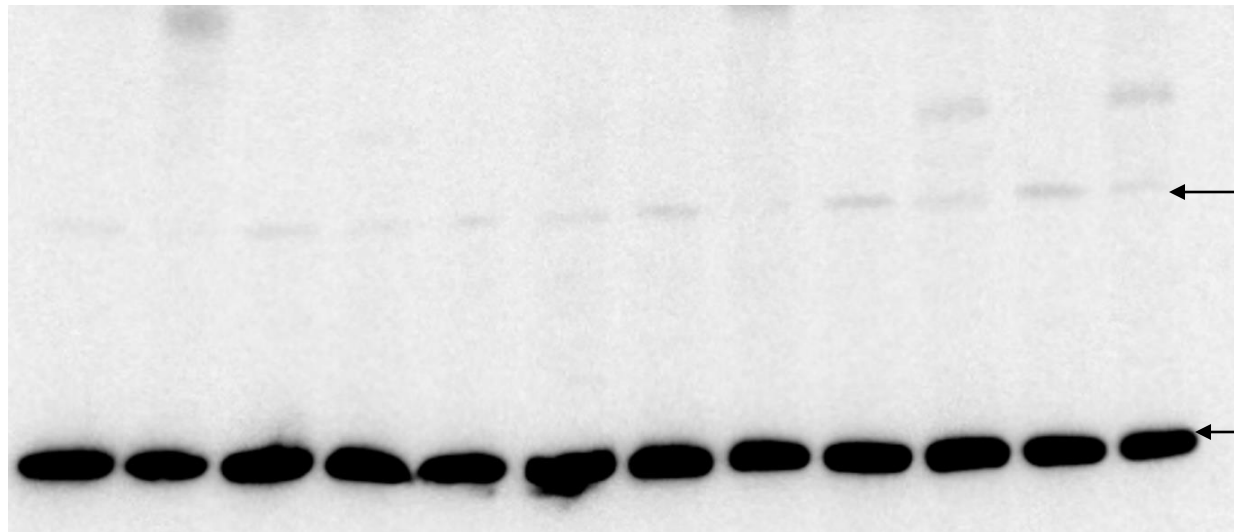

C1 E1 C2 E2 C3 E3 C4 E4 C5 E5 C6 E6

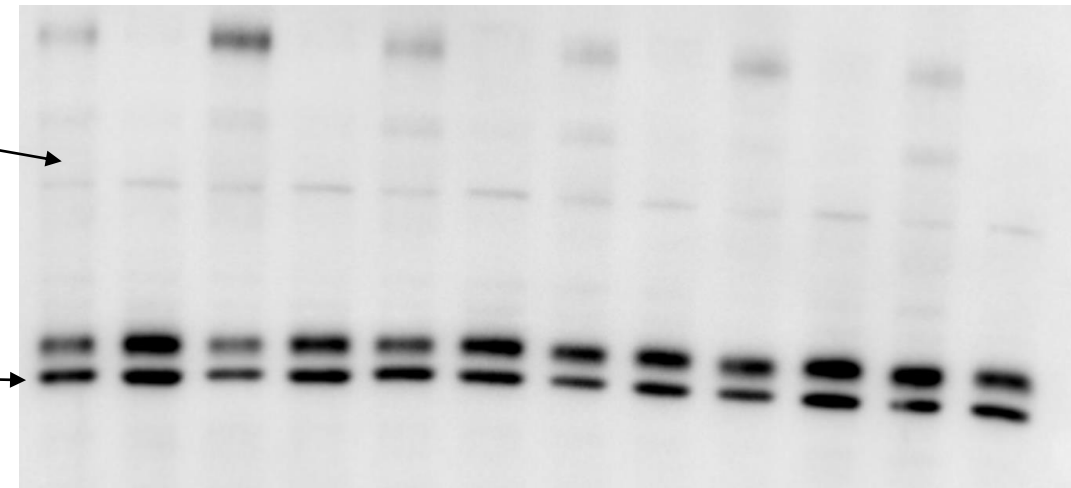

C1 E1 C2 E2 C3 E3 C4 E4 C5 E5 C6 E6

FTO Blot 2021/04/23

Figure 2E

FTO Blot 2022/05/27

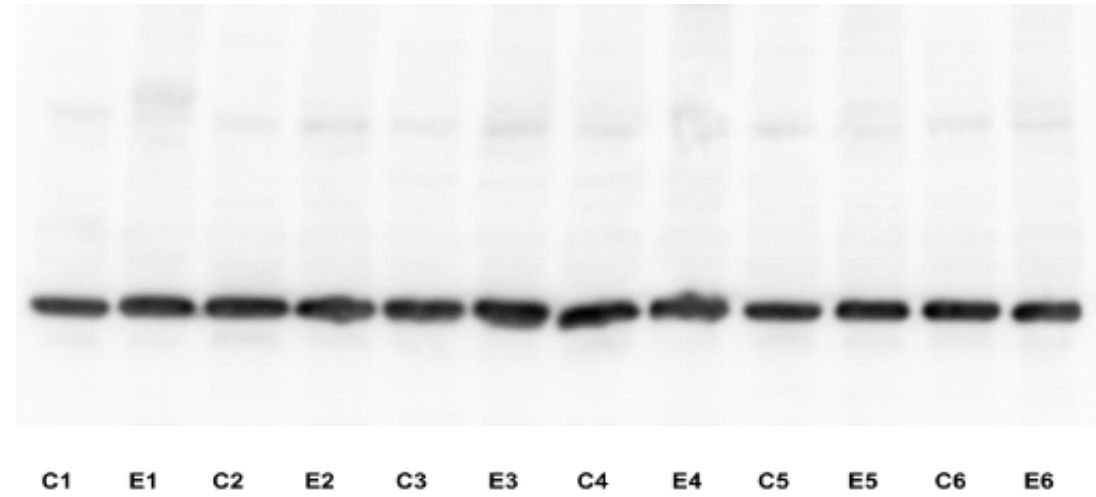

← FTO →  
← GAPDH →

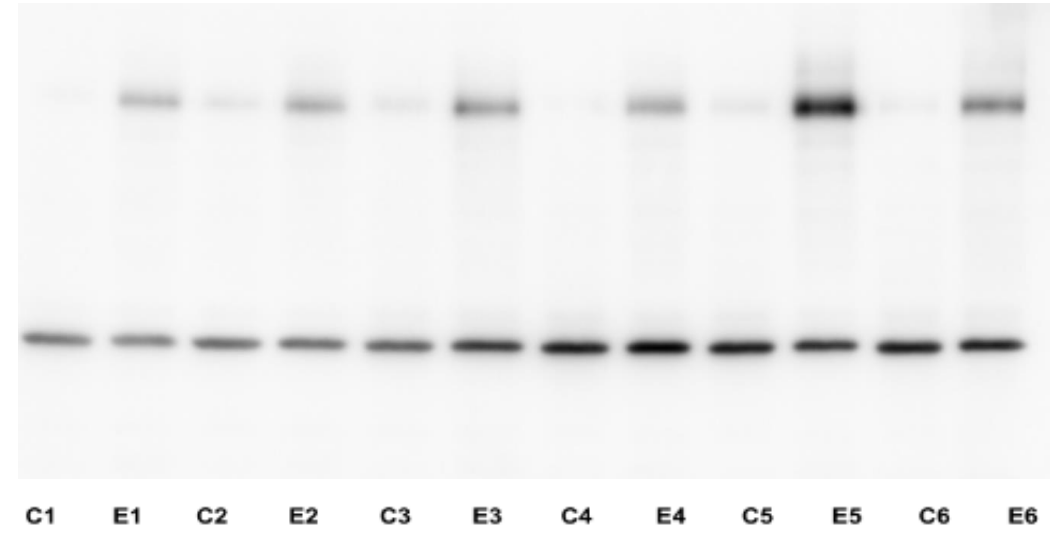

ALKBH5 Blot 2021/08/19

Figure 2E

ALKBH5 Blot 2022/05/30

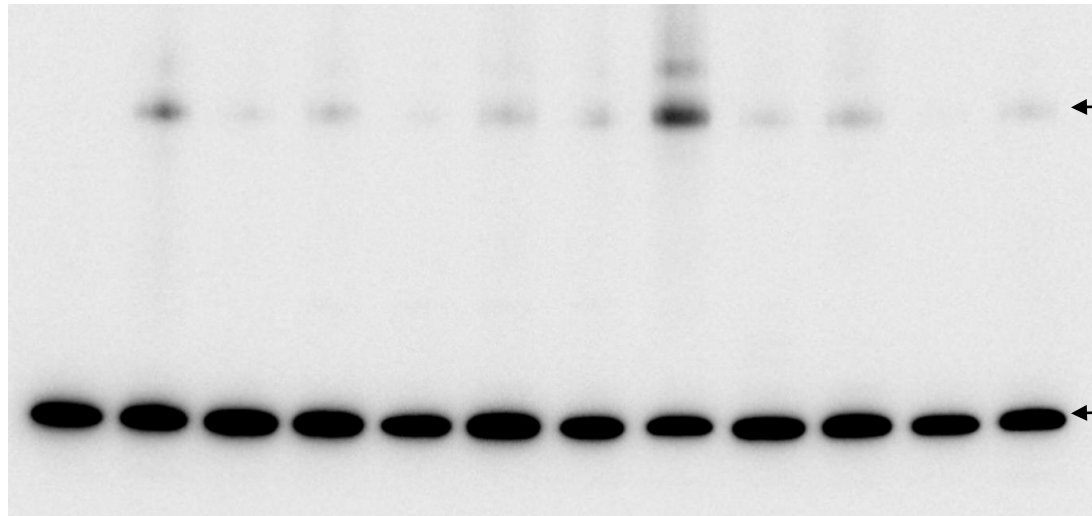

C1 E1 C2 E2 C3 E3 C4 E4 C5 E5 C6 E6

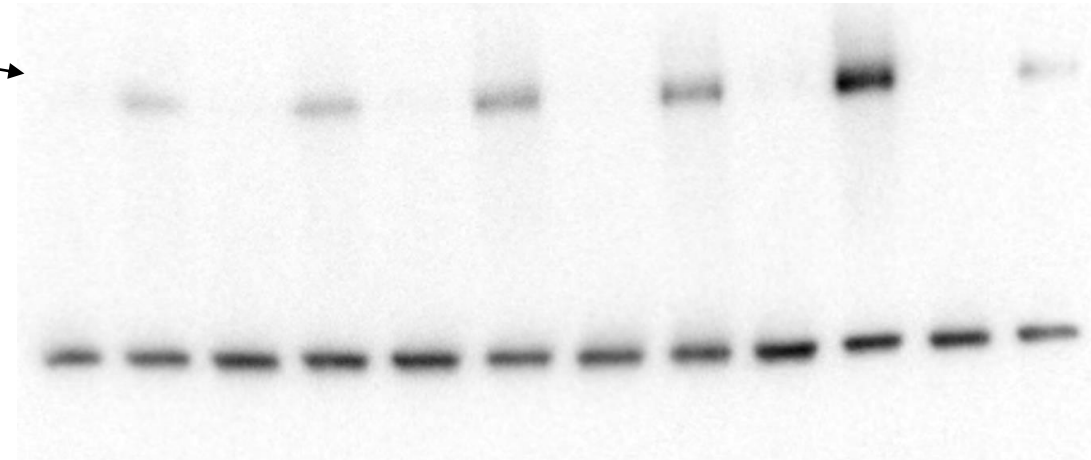

C1 E1 C2 E2 C3 E3 C4 E4 C5 E5 C6 E6

Figure 8F

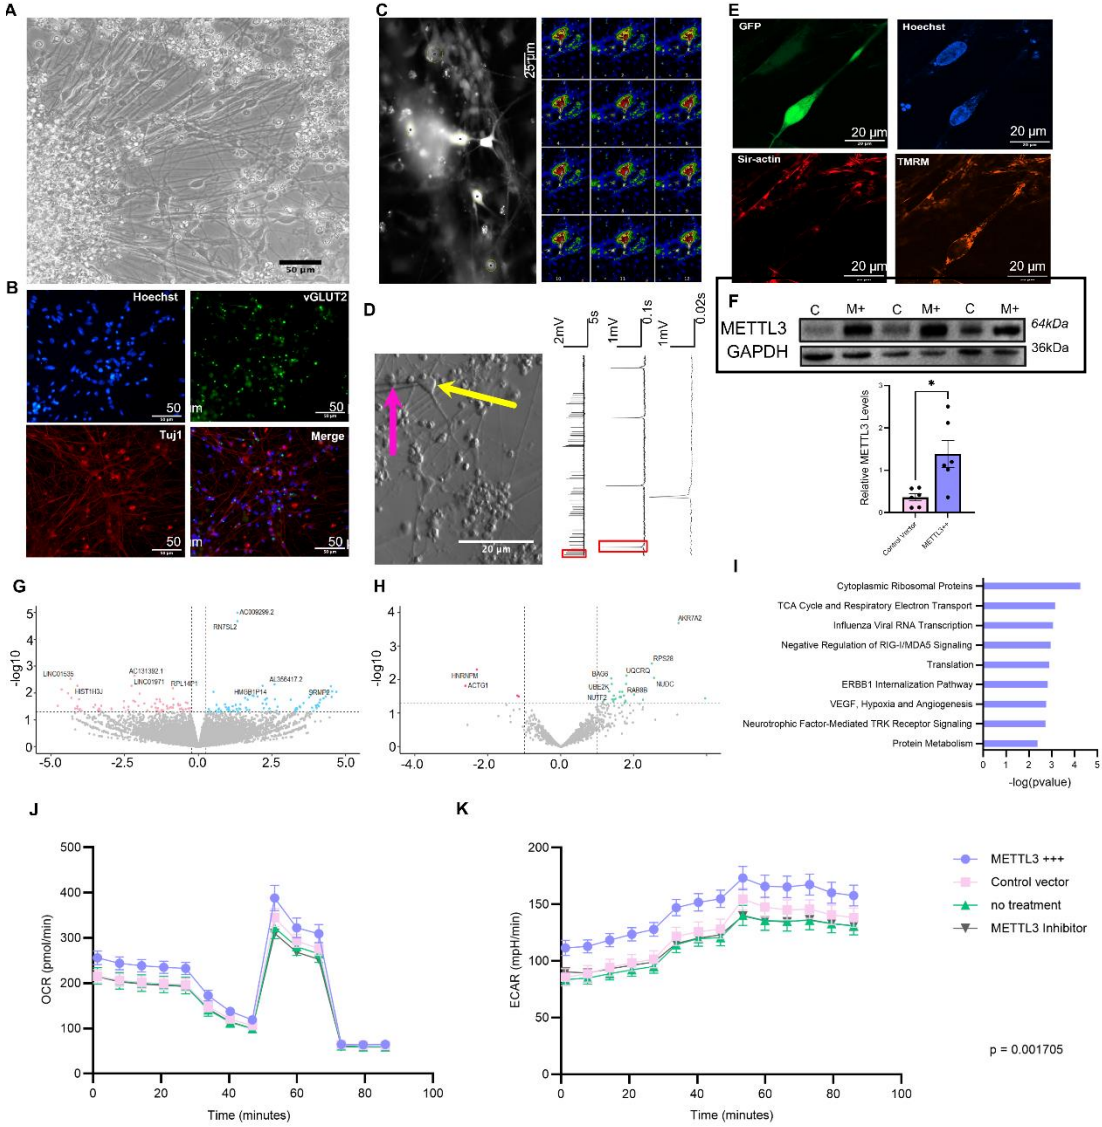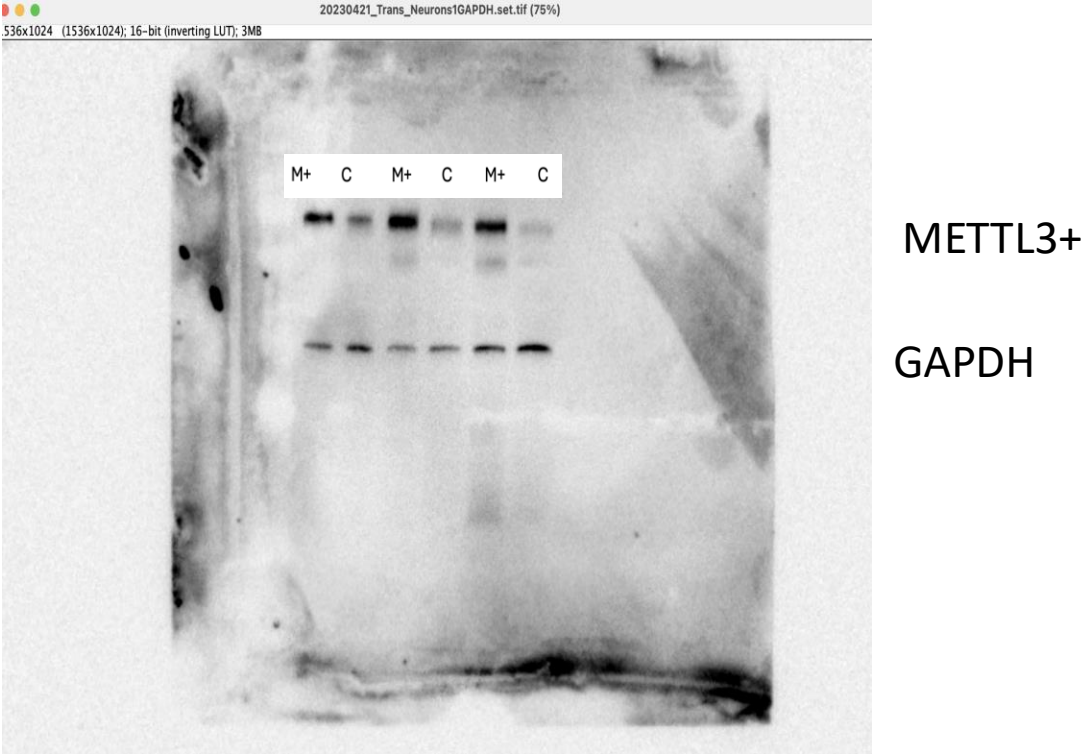

Image Flipped in paper to show control sample 1st
